# Supplementary material for: Circulating Tumor Cell Enumeration and Characterization in Metastatic Castration-Resistant Prostate Cancer Patients Treated with Cabazitaxel
Source: MDPI journal article supplement (doi:10.3390/cancers11081212), 2019-08-20
Supplement: s1 [file s1]

**Supplementary table S1.** Genes used for gene-expression profile

| A All 96 genes in the gene-expression panel (including 3 reference genes) |                |                |                |                    |
|---------------------------------------------------------------------------|----------------|----------------|----------------|--------------------|
| <i>ABCC4</i>                                                              | <i>CDK12</i>   | <i>FZD7</i>    | <i>NTS</i>     | <i>STYK1</i>       |
| <i>ACPP</i>                                                               | <i>CDK4</i>    | <i>GUCY1A3</i> | <i>PCGEM1</i>  | <i>TACC2</i>       |
| <i>ADRA2C</i>                                                             | <i>CEACAM5</i> | <i>HNF1A</i>   | <i>PIK3CA</i>  | <i>TBX3</i>        |
| <i>AGR2</i>                                                               | <i>COL18A1</i> | <i>IGFBP4</i>  | <i>PIK3CB</i>  | <i>TCF7L2</i>      |
| <i>AKR1C3</i>                                                             | <i>CREB3L4</i> | <i>IGFBP5</i>  | <i>PLAU</i>    | <i>TMPRSS2</i>     |
| <i>APC</i>                                                                | <i>CRISP3</i>  | <i>ITGA6</i>   | <i>PMEPA1</i>  | <i>TMPRSS2_ERG</i> |
| <i>APP</i>                                                                | <i>CYP11A1</i> | <i>KIT</i>     | <i>PPAP2A</i>  | <i>UGT2B15</i>     |
| <i>AR</i>                                                                 | <i>CYP17A1</i> | <i>KLK2</i>    | <i>PPARG</i>   | <i>WNT11</i>       |
| <i>AR_V1</i>                                                              | <i>DDC</i>     | <i>KLK3</i>    | <i>PRKACB</i>  | <i>WNT4</i>        |
| <i>AR_V3</i>                                                              | <i>DHCR24</i>  | <i>KRT8</i>    | <i>PTEN</i>    | <i>WNT5A</i>       |
| <i>AR_V7</i>                                                              | <i>DKK1</i>    | <i>LAD1</i>    | <i>PTPN1</i>   | <i>ZBTB16</i>      |
| <i>AR_V9</i>                                                              | <i>DRG1</i>    | <i>LEF1</i>    | <i>RAD51B</i>  |                    |
| <i>AR_WT_fl</i>                                                           | <i>EAF2</i>    | <i>LRIG1</i>   | <i>RAD51C</i>  | Reference genes    |
| <i>AXIN2</i>                                                              | <i>ELL2</i>    | <i>MALAT1</i>  | <i>RB1</i>     | <i>GUSB</i>        |
| <i>BMP7</i>                                                               | <i>EPCAM</i>   | <i>MED12</i>   | <i>S100A16</i> | <i>HMBS</i>        |
| <i>BRCA2</i>                                                              | <i>EZH2</i>    | <i>MKI67</i>   | <i>SLC45A3</i> | <i>HPRT1</i>       |
| <i>CAV1</i>                                                               | <i>FAT1</i>    | <i>MSMB</i>    | <i>SLCO1B3</i> |                    |
| <i>CCND1</i>                                                              | <i>FKBP5</i>   | <i>MYC</i>     | <i>SOX9</i>    |                    |
| <i>CDH1</i>                                                               | <i>FOLH1</i>   | <i>NDRG1</i>   | <i>SP5</i>     |                    |
| <i>CDH10</i>                                                              | <i>FOXA1</i>   | <i>NKX3_1</i>  | <i>SRD5A2</i>  |                    |
|                                                                           |                |                |                |                    |
| B CTC-specific genes                                                      |                |                |                |                    |
| <i>AGR2</i>                                                               | <i>BMP7</i>    | <i>FKBP5</i>   | <i>MSMB</i>    | <i>TACC2</i>       |
| <i>AR</i>                                                                 | <i>CCND1</i>   | <i>FOLH1</i>   | <i>NKX3_1</i>  | <i>TBX3</i>        |
| <i>AR-V1</i>                                                              | <i>CDH1</i>    | <i>FOXA1</i>   | <i>PPAP2A</i>  | <i>TMPRSS2</i>     |
| <i>AR-V3</i>                                                              | <i>CRISP3</i>  | <i>KLK2</i>    | <i>PPARG</i>   | <i>TMPRSS2_ERG</i> |
| <i>AR-V7</i>                                                              | <i>DKK1</i>    | <i>KLK3</i>    | <i>SOX9</i>    | <i>UGT2B15</i>     |
| <i>AR-V9</i>                                                              | <i>EPCAM</i>   | <i>KRT8</i>    | <i>SP5</i>     | <i>WNT5A</i>       |
| <i>AR_WT_fl</i>                                                           | <i>FAT1</i>    | <i>LAD1</i>    | <i>STYK1</i>   |                    |

A) All 96 genes that were measured in the samples with available RNA. B) The 34 genes with higher expression in CTC samples compared to the background of leukocytes.
