# Supplementary material for: Circulating Tumor Cell Enumeration and Characterization in Metastatic Castration-Resistant Prostate Cancer Patients Treated with Cabazitaxel
Source: MDPI journal article supplement (doi:10.3390/cancers11081212), 2019-08-20
Supplement: s1 [file s1]

**Supplementary table S2.** Univariate regression analysis of PFS**Univariate analysis PFS**

| Gene        | Exp(B) | 95% CI    | sig   |
|-------------|--------|-----------|-------|
| AGR2        | 1.087  | 1.02-1.16 | 0.008 |
| AR          | 1.069  | 1.0-1.15  | 0.059 |
| AR_V1       | 1.012  | 0.96-1.07 | 0.653 |
| AR_V3       | 1.034  | 0.96-1.12 | 0.393 |
| AR_V7       | 1.013  | 0.93-1.10 | 0.768 |
| AR_V9       | 0.996  | 0.94-1.06 | 0.905 |
| AR_WT_fl    | 1.066  | 1.00-1.14 | 0.071 |
| BMP7        | 1.042  | 0.99-1.10 | 0.141 |
| CCND1       | 1.031  | 0.92-1.16 | 0.607 |
| CDH1        | 1.037  | 0.96-1.13 | 0.391 |
| CRISP3      | 0.962  | 0.86-1.08 | 0.498 |
| DKK1        | 1.072  | 1.01-1.14 | 0.022 |
| EPCAM       | 1.056  | 0.94-1.18 | 0.341 |
| FAT1        | 1.068  | 1.01-1.13 | 0.030 |
| FKBP5       | 1.004  | 0.84-1.21 | 0.969 |
| FOLH1       | 1.047  | 1.00-1.10 | 0.074 |
| FOXA1       | 1.078  | 1.01-1.15 | 0.024 |
| KLK2        | 1.055  | 0.99-1.13 | 0.115 |
| KLK3        | 1.034  | 0.97-1.10 | 0.310 |
| KRT8        | 1.065  | 0.96-1.18 | 0.223 |
| LAD1        | 1.036  | 0.99-1.09 | 0.146 |
| MSMB        | 1.028  | 0.98-1.08 | 0.261 |
| NKX3_1      | 1.012  | 0.78-1.31 | 0.928 |
| PPAP2A      | 1.058  | 0.93-1.20 | 0.376 |
| PPARG       | 0.985  | 0.85-1.14 | 0.832 |
| SOX9        | 1.030  | 0.98-1.09 | 0.283 |
| SP5         | 1.041  | 0.99-1.10 | 0.115 |
| STYK1       | 1.013  | 0.95-1.08 | 0.699 |
| TACC2       | 1.040  | 0.99-1.09 | 0.129 |
| TBX3        | 1.050  | 0.99-1.11 | 0.092 |
| TMPRSS2     | 1.058  | 1.00-1.12 | 0.037 |
| TMPRSS2_ERG | 1.026  | 0.98-1.08 | 0.318 |
| UGT2B15     | 1.052  | 0.98-1.13 | 0.173 |
| WNT5A       | 1.033  | 0.96-1.12 | 0.407 |

*Univariate Cox Regression analysis of all 34 genes in comparison with PFS in 63 patients with available gene expression data.*
